# Supplementary material
Source: PubMed Central journal article supplement (PMC3035714)
Supplement: mmc1.pdf [file mmc1.pdf]

**The American Journal of Human Genetics, Volume 88**

**Supplemental Data**

**Ancient Voyaging and Polynesian Origins**

**Pedro Soares, Teresa Rito, Jean Trejaut, Maru Mormina, Catherine Hill,  
Emma Tinkler-Hundal, Michelle Braid, Douglas J. Clarke, Jun-Hun Loo,  
Noel Thomson, Tim Denham, Mark Donohue, Vincent Macaulay, Marie Lin,  
Stephen Oppenheimer, and Martin B. Richards**



**Figure S1. Phylogeny of 157 Complete mtDNA Genomes from Haplogroup B4**  
Branch lengths were scaled using maximum likelihood and a time-dependent clock (ML analysis 1). Age estimates in years for complete genomes (CS) and synonymous mutations (SYN) are indicated for the most relevant nodes in this study. Synonymous mutations are underlined. Mutations are transitions at the nucleotide position indicated unless otherwise specified.

**Table S1. Complete mtDNA Genomes Used in the Analysis**

|    | Haplogroup | Region   | Sub-region/group        | Sequences | ML analysis |   |   |   | Notes | Reference                               |
|----|------------|----------|-------------------------|-----------|-------------|---|---|---|-------|-----------------------------------------|
|    |            |          |                         |           | 1           | 2 | 3 | 4 |       |                                         |
| .  | R11        | China    | Qingdao, Shandong       | AY255163  | x           | x | x | x |       | Kong et al. 2003 <sup>1</sup>           |
| .  | R9b1a      | Malaysia | Semelai                 | AY963579  | x           | x | x | x |       | Macaulay et al. 2005 <sup>2</sup>       |
| .  | F3a        | China    | Yili, Xinjiang          | AY255167  | x           | x | x | x |       | Kong et al. 2003 <sup>1</sup>           |
| .  | A6         | China    | Wuhan, Hubei            | AY255166  | x           | x | x | x |       | Kong et al. 2003 <sup>1</sup>           |
| .  | Y2         | China    | Qijiang, Chongqing      | DQ272121  | x           | x | x | x |       | Kong et al. 2006 <sup>3</sup>           |
| .  | B5a1       | China    | Wuhan, Hubei            | AY255145  | x           | x | x | x |       | Kong et al. 2003 <sup>1</sup>           |
| .  | B5b2a      | China    | Wuhan, Hubei            | AY255179  | x           | x | x | x |       | Kong et al. 2003 <sup>1</sup>           |
| 1  | B4f        | Japan    | Aichi                   | AP008788  | x           | x | x | x |       | Tanaka et al. 2004 <sup>4</sup>         |
| 2  | B4f        | Japan    | Tokyo                   | AP008262  | x           | x | x | x |       | Tanaka et al. 2004 <sup>4</sup>         |
| 3  | B4g        | China    | Zhanjiang, Guangdong    | AY255133  | x           | x | x | x |       | Kong et al. 2003 <sup>1</sup>           |
| 4  | B4g        | Vietnam  | Tay-Nung                | VNM311    | x           | x | x | x |       | This study                              |
| 5  | B4e        | Japan    | Tokyo                   | AP008436  | x           | x | x | x |       | Tanaka et al. 2004 <sup>4</sup>         |
| 6  | B4d        | Japan    | Chiba                   | AP008492  | x           | x | x | x |       | Tanaka et al. 2004 <sup>4</sup>         |
| 7  | B4d1       | Russia   | Siberia: Buriat         | AY519484  | x           | x | x | x |       | Starikovskaya et al. 2005 <sup>5</sup>  |
| 8  | B4d1       | China    | Qingdao, Shandong       | AY255140  | x           | x | x | x |       | Kong et al. 2003 <sup>1</sup>           |
| 9  | B4d1       | China    | Fengcheng, Liaoning     | AY255135  | x           | x | x | x |       | Kong et al. 2003 <sup>1</sup>           |
| 10 | B2         | America  | Native American         | AY195749  | x           | x | x | x |       | Mishmar et al. 2003 <sup>6</sup>        |
| 11 | B2         | America  | Native American (Pinam) | AF347001  | x           | x | x | x |       | Ingman et al. 2000 <sup>7</sup>         |
| 12 | B4b1b      | Japan    | Aichi                   | AP008682  | x           | x | x | x |       | Tanaka et al. 2004 <sup>4</sup>         |
| 13 | B4b1b      | Vietnam  | Hanoi                   | VN016     | x           | x | x | x |       | This study (Trejaut/Taipei lab data)    |
| 14 | B4b1b      | Mongolia |                         | DQ272119  | x           | x | x | x |       | Kong et al. 2006 <sup>3</sup>           |
| 15 | B4b1a      | Russia   | Siberia: Tubular        | AY519494  | x           | x | x | x |       | Starikovskaya et al. 2005 <sup>5</sup>  |
| 16 | B4b1a2     | Japan    | Tokyo                   | AP008856  | x           | x | x | x |       | Tanaka et al. 2004 <sup>4</sup>         |
| 17 | B4b1a2     | China    | Zhanjiang, Guangdong    | AY255170  | x           | x | x | x |       | Kong et al. 2003 <sup>1</sup>           |
| 18 | B4b1a1     | Japan    | Tokyo                   | AP008900  | x           | x | x | x |       | Tanaka et al. 2004 <sup>4</sup>         |
| 19 | B4b1a1     | Japan    | Aichi                   | AP008594  | x           | x | x | x |       | Tanaka et al. 2004 <sup>4</sup>         |
| 20 | B4b1a1     | Japan    | Tokyo                   | AP008355  | x           | x | x | x |       | Tanaka et al. 2004 <sup>4</sup>         |
| 21 | B4c2       | Thailand |                         | AY289100  | x           | x | x | x |       | Ingman and Gyllensten 2003 <sup>8</sup> |
| 22 | B4c2       | Thailand |                         | AY289101  | x           | x | x | x |       | Ingman and Gyllensten 2003 <sup>8</sup> |
| 23 | B4c1c      | Japan    | Chiba                   | AP008450  | x           | x | x | x |       | Tanaka et al. 2004 <sup>4</sup>         |
| 24 | B4c1c      | Japan    | Aichi                   | AP008563  | x           | x | x | x |       | Tanaka et al. 2004 <sup>4</sup>         |
| 25 | B4c1a      | Japan    | Tokyo                   | AP008281  | x           | x | x | x |       | Tanaka et al. 2004 <sup>4</sup>         |
| 26 | B4c1a      | Japan    | Chiba                   | AP008470  | x           | x | x | x |       | Tanaka et al. 2004 <sup>4</sup>         |
| 27 | B4c1b      | China    | Fengcheng, Liaoning     | AY255149  | x           | x | x | x |       | Kong et al. 2003 <sup>1</sup>           |
| 28 | B4c1b      | Japan    | Chiba                   | AP008472  | x           | x | x | x |       | Tanaka et al. 2004 <sup>4</sup>         |
| 29 | B4c1b      | Japan    | Aichi                   | AP008570  | x           | x | x | x |       | Tanaka et al. 2004 <sup>4</sup>         |
| 30 | B4c1b      | Japan    | Tokyo                   | AP008899  | x           | x | x | x |       | Tanaka et al. 2004 <sup>4</sup>         |
| 31 | B4a*       | Taiwan   | Siraya                  | SL309     | x           | x | x | x |       | This study (Trejaut/Taipei lab data)    |
| 32 | B4h        | China    | Fujian                  | Fuj4752   | x           | x | x | x |       | This study (Trejaut/Taipei lab data)    |
| 33 | B4h        | China    | Fujian                  | FC076     | x           | x | x | x |       | This study (Trejaut/Taipei lab data)    |
| 34 | B4a        | Japan    | Tokyo                   | AP008384  | x           | x | x | x |       | Tanaka et al. 2004 <sup>4</sup>         |

|    |        |               |                        |          |   |   |   |   |  |                                        |
|----|--------|---------------|------------------------|----------|---|---|---|---|--|----------------------------------------|
| 35 | B4a    | Japan         | Aichi                  | AP008567 | x | x | x | x |  | Tanaka et al. 2004 <sup>4</sup>        |
| 36 | B4a2   | Japan         | Gifu                   | AP008257 | x | x | x | x |  | Tanaka et al. 2004 <sup>4</sup>        |
| 37 | B4a2a  | Indonesia     | Banjarmasin (Borneo)   | BAN3     | x | x | x | x |  | This study                             |
| 38 | B4a2a  | Taiwan        | Yami                   | AJ842751 | x | x | x | x |  | Trejaut et al. 2005 <sup>9</sup>       |
| 39 | B4a2a  | Taiwan        | Paiwan                 | AJ842750 | x | x | x | x |  | Trejaut et al. 2005 <sup>9</sup>       |
| 40 | B4a2a  | Taiwan        | Saisiat                | SA030    | x | x | x | x |  | This study (Trejaut/Taipei lab data)   |
| 41 | B4a1d  | Vietnam       | Kinh                   | V206     | x | x | x | x |  | This study                             |
| 42 | B4a1d  | Vietnam       | Hanoi                  | VN014    | x | x | x | x |  | This study (Trejaut/Taipei lab data)   |
| 43 | B4a1c  | Japan         | Chiba                  | AP008521 | x | x | x | x |  | Tanaka et al. 2004 <sup>4</sup>        |
| 44 | B4a1c  | Japan         | Aichi                  | AP008650 | x | x | x | x |  | Tanaka et al. 2004 <sup>4</sup>        |
| 45 | B4a1c  | Japan         | Aichi                  | AP008889 | x | x | x | x |  | Tanaka et al. 2004 <sup>4</sup>        |
| 46 | B4a1c  | Japan         | Tokyo                  | AP008912 | x | x | x | x |  | Tanaka et al. 2004 <sup>4</sup>        |
| 47 | B4a1c  | China         | GuangXi                | DQ272120 | x | x | x | x |  | Kong et al. 2006 <sup>3</sup>          |
| 48 | B4a1c  | Thailand      | Taiwan workers         | Thai107  | x | x | x | x |  | This study (Trejaut/Taipei lab data)   |
| 49 | B4a1c  | Russia        | Siberia: Tuvan         | AY519495 | x | x | x | x |  | Starikovskaya et al. 2005 <sup>5</sup> |
| 50 | B4a1c  | Russia        | Siberia: Tofalar       | AY519492 | x | x | x | x |  | Starikovskaya et al. 2005 <sup>5</sup> |
| 51 | B4a1c  |               |                        | AY195770 | x | x | x | x |  | Mishmar et al. 2003 <sup>6</sup>       |
| 52 | B4a1c  | China         | Fujian                 | Fuj4547  | x | x | x | x |  | This study (Trejaut/Taipei lab data)   |
| 53 | B4a1c  | Japan         | Aichi                  | AP008661 | x | x | x | x |  | Tanaka et al. 2004 <sup>4</sup>        |
| 54 | B4a1c  | Japan         | Tokyo                  | AP008412 | x | x | x | x |  | Tanaka et al. 2004 <sup>4</sup>        |
| 55 | B4a1b  | Japan         | Aichi                  | AP008595 | x | x | x | x |  | Tanaka et al. 2004 <sup>4</sup>        |
| 56 | B4a1b  | Japan         | Tokyo                  | AP008842 | x | x | x | x |  | Tanaka et al. 2004 <sup>4</sup>        |
| 57 | B4a1b  | Korea         |                        | AF346993 | x | x | x | x |  | Ingman et al. 2000 <sup>7</sup>        |
| 58 | B4a1b  | Japan         | Aichi                  | AP008597 | x | x | x | x |  | Tanaka et al. 2004 <sup>4</sup>        |
| 59 | B4a1b  | Japan         | Aichi                  | AP008640 | x | x | x | x |  | Tanaka et al. 2004 <sup>4</sup>        |
| 60 | B4a1b  | Japan         | Tokyo                  | AP008415 | x | x | x | x |  | Tanaka et al. 2004 <sup>4</sup>        |
| 61 | B4a1a  | Taiwan        | Ami                    | AJ842749 | x | x |   |   |  | Trejaut et al. 2005 <sup>9</sup>       |
| 62 | B4a1a  | Taiwan        | Yami                   | AJ842747 | x | x |   |   |  | Trejaut et al. 2005 <sup>9</sup>       |
| 63 | B4a1a  | Taiwan        | Atayal                 | AJ842746 | x | x |   |   |  | Trejaut et al. 2005 <sup>9</sup>       |
| 64 | B4a1a  | Taiwan        | Tsou                   | TS039    | x | x |   |   |  | This study (Trejaut/Taipei lab data)   |
| 65 | B4a1a2 | Taiwan        | Ami                    | AJ842745 | x | x |   |   |  | Trejaut et al. 2005 <sup>9</sup>       |
| 66 | B4a1a2 | Taiwan        | Ami                    | AJ842748 | x | x |   |   |  | Trejaut et al. 2005 <sup>9</sup>       |
| 67 | B4a1a  | Taiwan        | Ami                    | AMI12    | x | x |   |   |  | This study (Trejaut/Taipei lab data)   |
| 68 | B4a1a  | Indonesia     | Manado                 | MND36    | x |   | x |   |  | This study                             |
| 69 | B4a1a3 | Taiwan        | Ami                    | AM025    | x | x |   |   |  | This study (Trejaut/Taipei lab data)   |
| 70 | B4a1a3 | Taiwan        | Siraya                 | SL049    | x | x |   |   |  | This study (Trejaut/Taipei lab data)   |
| 71 | B4a1a3 | Taiwan        | Ami                    | AJ842744 | x | x |   |   |  | Trejaut et al. 2005 <sup>9</sup>       |
| 72 | B4a1a3 | East Malaysia | Kota Kinabalu (Borneo) | KK144    | x |   | x |   |  | This study                             |
| 73 | B4a1a3 | Indonesia     | Sumba                  | WA194    | x |   | x |   |  | This study                             |
| 74 | B4a1a  | Philippines   |                        | GQ119021 | x |   | x |   |  | Tabbada et al. 2010 <sup>10</sup>      |
| 75 | B4a1a  | East Malaysia | Kota Kinabalu (Borneo) | KK141    | x |   | x |   |  | This study                             |
| 76 | B4a1a  | Philippines   |                        | FIL18    | x |   | x |   |  | This study                             |
| 77 | B4a1a  | Philippines   |                        | FIL59    | x |   | x |   |  | This study                             |
| 78 | B4a1a  | Indonesia     | Banjarmasin (Borneo)   | BAN75    | x |   | x |   |  | This study                             |
| 79 | B4a1a  | Indonesia     | Ambon                  | AMB20    | x |   | x |   |  | This study                             |
| 80 | B4a1a  | Indonesia     | Banjarmasin (Borneo)   | BAN39    | x |   | x |   |  | This study                             |

|     |          |                      |                       |          |   |  |   |   |              |                                         |
|-----|----------|----------------------|-----------------------|----------|---|--|---|---|--------------|-----------------------------------------|
| 81  | B4a1a    | Indonesia            | Mataran               | MTR62    | x |  | x |   |              | This study                              |
| 82  | B4a1a    | Indonesia            | Toraja                | TOR31    | x |  | x |   |              | This study                              |
| 83  | B4a1a    | Indonesia            | Java                  | IN101    | x |  | x |   |              | This study(Trejaut/Taipei lab data)     |
| 84  | B4a1a    | Indonesia            | Manado                | MND37    | x |  | x |   |              | This study                              |
| 85  | B4a1a    | New Guinea           | Trobriand Islands     | DQ372871 |   |  |   |   |              | Pierson et al. 2006 <sup>11</sup>       |
| 86  |          | Philippines          | Mindanao              | GQ119029 |   |  |   |   |              | Tabbada et al. 2010 <sup>10</sup>       |
| 87  | B4a1a1   | Indonesia            | Ujung Pandang         | UJP18    | x |  | x |   |              | This study                              |
| 88  | B4a1a1   | Papua New Guinea     | North Coast           | AY289076 | x |  |   |   |              | Ingman and Gyllensten 2003 <sup>8</sup> |
| 89  | B4a1a1   | Micronesia           | Majuro Atoll          | DQ372877 | x |  |   |   |              | Pierson et al. 2006 <sup>11</sup>       |
| 90  | B4a1a1   | Micronesia           | Kapingamarangi Atoll  | DQ372874 | x |  |   |   |              | Pierson et al. 2006 <sup>11</sup>       |
| 91  | B4a1a1   | Micronesia           | Kapingamarangi Atoll  | DQ372875 | x |  |   |   |              | Pierson et al. 2006 <sup>11</sup>       |
| 92  | B4a1a1   | Bismarch Archipelago | Lihir Island          | L627     | x |  |   | x |              | This study                              |
| 93  | B4a1a1   | Bismarch Archipelago | Lihir Island          | L703     | x |  |   | x |              | This study                              |
| 94  | B4a1a1   | Bismarch Archipelago | Lihir Island          | L626     | x |  |   | x |              | This study                              |
| 95  | B4a1a1   | New Guinea           | Trobriand Islands     | DQ372873 | x |  |   |   |              | Pierson et al. 2006 <sup>11</sup>       |
| 96  | B4a1a1a  | Indonesia            | Ambon                 | AMB39    | x |  | x |   |              | This study                              |
| 97  | B4a1a1a  | Indonesia            | Mataran               | MTR12    | x |  | x |   |              | This study                              |
| 98  | B4a1a1a  | Indonesia            | Toraja                | TOR16    | x |  | x |   |              | This study                              |
| 99  | B4a1a1a  | Indonesia            | Mataran               | MTR8     | x |  | x |   |              | This study                              |
| 100 | B4a1a1a  | Indonesia            | Ujung Pandang         | UJP30    | x |  | x |   |              | This study                              |
| 101 | B4a1a1a  | Indonesia            | Manado                | MND21    | x |  | x |   |              | This study                              |
| 102 | B4a1a1a  | Indonesia            | Ambon                 | AMB108   | x |  | x |   |              | This study                              |
| 103 | B4a1a1a  | Indonesia            | Palangkaraya (Borneo) | PRY35    | x |  | x |   |              | This study                              |
| 104 | B4a1a1a  | Indonesia            | Ambon                 | AMB12    | x |  | x |   |              | This study                              |
| 105 | B4a1a1a  | Bismarch Archipelago | Kavieng               | K65      | x |  |   |   |              | This study                              |
| 106 | B4a1a1a  | Indonesia            | Banjarmasin (Borneo)  | BAN41    | x |  | x |   |              | This study                              |
| 107 | B4a1a1a  | Bismarch Archipelago | Kavieng               | K73      | x |  |   | x |              | This study                              |
| 108 | B4a1a1a  | West Papua           |                       | IR77     | x |  |   |   | dHPLC + CS   | This study                              |
| 109 | B4a1a1a  | Papua New Guinea     | Madang                | C12991   | x |  |   |   | dHPLC + CS   | This study                              |
| 110 | B4a1a1a  | Papua New Guinea     | North Coast           | AY289077 | x |  |   |   |              | Ingman and Gyllensten 2003 <sup>8</sup> |
| 111 | B4a1a1a  | Papua New Guinea     | Madang                | C7191    | x |  |   |   | Partly dHPLC | This study                              |
| 112 | B4a1a1a  | Papua New Guinea     | Madang                | C11191   | x |  |   |   | Partly dHPLC | This study                              |
| 113 | B4a1a1a  | Papua New Guinea     | North Coast           | AY289080 | x |  |   |   |              | Ingman and Gyllensten 2003 <sup>8</sup> |
| 114 | B4a1a1a  | Papua New Guinea     | Madang                | M4890    | x |  |   |   | dHPLC + CS   | This study                              |
| 115 | B4a1a1a  | Samoa                |                       | AF347007 | x |  |   |   |              | Ingman et al. 2000 <sup>7</sup>         |
| 116 | B4a1a1a  | Vanuatu              | Banks and Torres      | BT5      |   |  |   |   | Partly dHPLC | This study                              |
| 117 | B4a1a1a  | Vanuatu              | Banks and Torres      | BT15     |   |  |   |   | Partly dHPLC | This study                              |
| 118 | B4a1a1a  | Vanuatu              | Banks and Torres      | BT86     |   |  |   |   | Partly dHPLC | This study                              |
| 119 | B4a1a1a  | Vanuatu              | Banks and Torres      | BT21     |   |  |   |   | Partly dHPLC | This study                              |
| 120 | B4a1a1a  | Papua New Guinea     | Madang                | M0591    | x |  |   |   | Partly dHPLC | This study                              |
| 121 | B4a1a1a  | Vanuatu              | Espiritu Santo        | DQ372878 | x |  |   |   |              | Pierson et al. 2006 <sup>11</sup>       |
| 122 | B4a1a1a  | Vanuatu              | Port Olry             | PO49     |   |  |   |   | Partly dHPLC | This study                              |
| 123 | B4a1a1a1 | Papua New Guinea     | North Coast           | AY289083 |   |  |   |   |              | Ingman and Gyllensten 2003 <sup>8</sup> |
| 124 | B4a1a1a1 | Bismarch Archipelago | Lihir Island          | L712     | x |  |   |   |              | This study                              |
| 125 | B4a1a1a1 | Papua New Guinea     | South Highlands       | KZ522    | x |  |   |   |              | This study                              |
| 126 | B4a1a1a1 | Papua New Guinea     | South Highlands       | KZ517    | x |  |   |   |              | This study                              |

|     |          |                      |                  |          |   |  |  |   |              |                                         |
|-----|----------|----------------------|------------------|----------|---|--|--|---|--------------|-----------------------------------------|
| 127 | B4a1a1a1 | Papua New Guinea     | South Highlands  | KZ528    | x |  |  |   |              | This study                              |
| 128 | B4a1a1a1 | Bismarch Archipelago | Kavieng          | K95      | x |  |  | x |              | This study                              |
| 129 | B4a1a1a1 | Bismarch Archipelago | Kavieng          | K86      | x |  |  | x |              | This study                              |
| 130 | B4a1a1a1 | Bismarch Archipelago | Kavieng          | K38      | x |  |  | x |              | This study                              |
| 131 | B4a1a1a1 | Bismarch Archipelago | Kavieng          | K59      | x |  |  | x |              | This study                              |
| 132 | B4a1a1a1 | Bismarch Archipelago | Kavieng          | K56      | x |  |  | x |              | This study                              |
| 133 | B4a1a1a1 | Bismarch Archipelago | Kavieng          | K11      | x |  |  | x |              | This study                              |
| 134 | B4a1a1a1 | Bismarch Archipelago | Lihir Island     | L735     | x |  |  | x |              | This study                              |
| 135 | B4a1a1a1 | Bismarch Archipelago | Lihir Island     | L623     | x |  |  | x |              | This study                              |
| 136 | B4a1a1a1 | Bismarch Archipelago | Lihir Island     | L746     | x |  |  | x |              | This study                              |
| 137 | B4a1a1a1 | Vanuatu              | Banks and Torres | BT80     |   |  |  |   | dHPLC + CS   | This study                              |
| 138 | B4a1a1a1 | Vanuatu              | Port Olry        | PO76     |   |  |  |   | Partly dHPLC | This study                              |
| 139 | B4a1a1a1 | Vanuatu              | Banks and Torres | BT79     |   |  |  |   | Partly dHPLC | This study                              |
| 140 | B4a1a1a1 | Samoa                |                  | AY289093 |   |  |  |   |              | Ingman and Gyllensten 2003 <sup>8</sup> |
| 141 | B4a1a1a1 | Cook Islands         | Atiu             | AY289069 |   |  |  |   |              | Ingman and Gyllensten 2003 <sup>8</sup> |
| 142 | B4a1a1a  | Bismarch Archipelago | Kavieng          | K91      | x |  |  | x |              | This study                              |
| 143 | B4a1a1a  | Bismarch Archipelago | Kavieng          | K25      | x |  |  | x |              | This study                              |
| 144 | B4a1a1a  | Bismarch Archipelago | Kavieng          | K16      | x |  |  | x |              | This study                              |
| 145 | B4a1a1a  | Bismarch Archipelago | Kavieng          | K53      | x |  |  | x |              | This study                              |
| 146 | B4a1a1a  | Bismarch Archipelago | Kavieng          | K68      | x |  |  | x |              | This study                              |
| 147 | B4a1a1a  | Bismarch Archipelago | Kavieng          | K82      | x |  |  | x |              | This study                              |
| 148 | B4a1a1a  | Bismarch Archipelago | Kavieng          | K27      | x |  |  | x |              | This study                              |
| 149 | B4a1a1a  | Bismarch Archipelago | Kavieng          | K9       | x |  |  | x |              | This study                              |
| 150 | B4a1a1a  | Samoa                |                  | AY289094 |   |  |  |   |              | Ingman and Gyllensten 2003 <sup>8</sup> |
| 151 | B4a1a1a  | Bougainville         |                  | AY963574 | x |  |  |   |              | Macaulay et al. 2005 <sup>2</sup>       |
| 152 | B4a1a1a  | Vanuatu              | Espiritu Santo   | DQ372881 |   |  |  |   |              | Pierson et al. 2006 <sup>11</sup>       |
| 153 | B4a1a1a  | Vanuatu              | Banks and Torres | BT62     |   |  |  |   | Partly dHPLC | This study                              |
| 154 | B4a1a1a  | Vanuatu              | Port Olry        | PO44     |   |  |  |   | Partly dHPLC | This study                              |
| 155 | B4a1a1a  | Cook Islands         | Atiu             | AY289068 |   |  |  |   |              | Ingman and Gyllensten 2003 <sup>8</sup> |
| 156 | B4a1a1a  | Tonga                |                  | DQ372886 |   |  |  |   |              | Pierson et al. 2006 <sup>11</sup>       |
| 157 | B4a1a1a  | Tonga                |                  | AY289102 |   |  |  |   |              | Ingman and Gyllensten 2003 <sup>8</sup> |

Haplogroup, region, sub-region or ethnic group are indicated where the information is available. References and accession numbers for published sequences are indicated. The inclusion of the sequences in each of the four ML analyses is indicated. Partial dHPLC refers to mtDNA genomes whose variation was partially assessed through dHPLC with only a portion sequenced. dHPLC + CS refers to genomes initially generated in the same way but then completely sequenced.

**Table S2. Control-Region Data for B4a and Additional Coding-Region Markers Typed in the Laboratories in Leeds and Taipei**

| Samples and HVS-I variants from CRS                        | Haplogroup | <i>n</i> | 10238 | 6719 | 12239 | 15746 | 14022 | Complete sequences and notes |
|------------------------------------------------------------|------------|----------|-------|------|-------|-------|-------|------------------------------|
| <b>Leeds Laboratory</b>                                    |            |          |       |      |       |       |       |                              |
| <b>Taiwan – Ami (<i>n</i>=31)</b>                          |            |          |       |      |       |       |       |                              |
| 189 217 261                                                | B4a1a      | 1        | ND    | 1    | 1     | 1     | 0     |                              |
| 189 217 261 311                                            | B4a1a      | 5        | ND    | 1    | 1     | 1     | 0     | Seq. 67                      |
| <b>Taiwan – Atayal (<i>n</i>=18)</b>                       |            |          |       |      |       |       |       |                              |
| 189 217 261 324                                            | B4a2a      | 2        | ND    | ND   | ND    | ND    | ND    |                              |
| 154 189 217 261 324                                        | B4a2a      | 1        | ND    | ND   | ND    | ND    | ND    |                              |
| <b>Taiwan – Paiwan (<i>n</i>=21)</b>                       |            |          |       |      |       |       |       |                              |
| 189 217 261                                                | B4a1a      | 2        | ND    | 1    | 1     | 1     | 0     |                              |
| 189 217 261 272 324                                        | B4a2a      | 3        | ND    | ND   | ND    | ND    | ND    |                              |
| 189 217 261 272 288 324                                    | B4a2a      | 1        | ND    | ND   | ND    | ND    | ND    |                              |
| <b>Philippines – Undetermined (<i>n</i>=61)</b>            |            |          |       |      |       |       |       |                              |
| 189 217 261                                                | B4a1a      | 4        | ND    | 1    | 1     | 1     | 0     | Seq. 76                      |
| 189 217 261 293                                            | B4a1a      | 2        | ND    | 1    | 1     | 1     | 0     |                              |
| 092 189 217 261 293                                        | B4a1a      | 5        | ND    | 1    | 1     | 1     | 0     | Seq. 77                      |
| <b>Indonesia – Alor (<i>n</i>=100)</b>                     |            |          |       |      |       |       |       |                              |
| 189 217 261                                                | B4a1a      | 3        | ND    | 1    | 1     | 1     | 0     |                              |
| 189 217 247 261                                            | B4a1a1a    | 2        | ND    | 1    | 1     | 1     | ND    |                              |
| <b>Indonesia – Ambon (<i>n</i>=44)</b>                     |            |          |       |      |       |       |       |                              |
| 189 217 261                                                | B4a*       | 1        | 0     | ND   | ND    | ND    | ND    | Seq. 79                      |
| 189 217 261                                                | B4a1a      | 2        | ND    | 1    | 1     | 1     | 0     |                              |
| 189 217 223 261                                            | B4a1a      | 1        | ND    | 1    | 1     | 1     | 0     |                              |
| 189 217 223 261 325                                        | B4a1a      | 1        | ND    | 1    | 1     | 1     | 0     |                              |
| 189 217 261 278                                            | B4a1a      | 1        | ND    | 1    | 1     | 1     | 0     | Seq. 96, 102                 |
| 189 217 247 261                                            | B4a1a      | 5        | ND    | 1    | 1     | 1     | 0     |                              |
| 189 217 247 261 362                                        | B4a1a1a    | 1        | ND    | 1    | 1     | 1     | ND    | Seq. 104                     |
| <b>Indonesia – Bali (<i>n</i>=69)</b>                      |            |          |       |      |       |       |       |                              |
| 108 189 217 261                                            | B4a1a      | 1        | ND    | 1    | 1     | 1     | 0     |                              |
| <b>Indonesia – Banjarmasin, Borneo (<i>n</i>=89)</b>       |            |          |       |      |       |       |       |                              |
| 189 217 261                                                | B4a1a      | 5        | ND    | 1    | 1     | 1     | 0     | Seq. 78                      |
| 178 189 217 261                                            | B4a1a      | 2        | ND    | 1    | 1     | 1     | 0     | Seq. 80                      |
| 189 217 247 261                                            | B4a1a1a    | 1        | ND    | 1    | 1     | 1     | 0     |                              |
| 093 189 217 247 261                                        | B4a1a1a    | 1        | ND    | 1    | 1     | 1     | 0     | Seq. 106                     |
| 189 217 261 324                                            | B4a2a      | 1        | ND    | ND   | ND    | ND    | ND    | Seq. 37                      |
| <b>Brunei (<i>n</i>=30)</b>                                |            |          |       |      |       |       |       |                              |
| 189 217 261                                                | B4a1a      | 2        | ND    | 1    | 1     | 1     | 0     |                              |
| <b>East Malaysia – Kota Kinabalu, Borneo (<i>n</i>=76)</b> |            |          |       |      |       |       |       |                              |
| 189 217 261                                                | B4a1a      | 4        | ND    | 1    | 1     | 1     | 0     | Seq. 75                      |
| 189 217 223 261                                            | B4a1a      | 3        | ND    | 1    | 1     | 1     | 0     | Seq. 72                      |
| 092 189 223 217 261                                        | B4a1a      | 1        | ND    | 1    | 1     | 1     | 0     |                              |
| <b>Indonesia – Manado, Sulawesi (<i>n</i>=89)</b>          |            |          |       |      |       |       |       |                              |
| 189 217 261                                                | B4a1a      | 1        | ND    | 1    | 1     | 1     | 0     | Seq. 84                      |



|                                                     |         |    |    |    |    |    |    |                              |
|-----------------------------------------------------|---------|----|----|----|----|----|----|------------------------------|
| <b>189 217 261 288</b>                              | B4ala   | 1  | ND | 1  | 1  | 1  | 0  |                              |
| <b>189 217 261 311</b>                              | B4ala   | 1  | ND | 1  | 1  | 1  | 0  | Seq. 68                      |
| <b>189 217 247 261</b>                              | B4alala | 1  | ND | 1  | 1  | 1  | ND | Seq. 101                     |
| <b>Indonesia – Mataram, Lombok (n=74)</b>           |         |    |    |    |    |    |    |                              |
| <b>189 217 261</b>                                  | B4ala   | 2  | ND | 1  | 1  | 1  | 0  | Seq. 81                      |
| <b>189 217 261 400</b>                              | B4ala   | 1  | ND | 1  | 1  | 1  | 0  |                              |
| <b>189 217 247 261</b>                              | B4alala | 3  | ND | 1  | 1  | 1  | ND | Seq. 97, 99                  |
| <b>Indonesia – Palembang, Sumatra (n=37)</b>        |         |    |    |    |    |    |    |                              |
| <b>189 261</b>                                      | B4a*    | 1  | 0  | ND | ND | ND | ND |                              |
| <b>Indonesia – Padang, Sumatra (n=25)</b>           |         |    |    |    |    |    |    |                              |
| <b>189 217 261</b>                                  | B4ala   | 2  | ND | 1  | 1  | 1  | 0  |                              |
| <b>Indonesia – Palangkaraya, Borneo (n=112)</b>     |         |    |    |    |    |    |    |                              |
| <b>189 217 261</b>                                  | B4ala   | 4  | ND | 1  | 1  | 1  | 0  |                              |
| <b>093 189 217 261</b>                              | B4ala   | 1  | ND | 1  | 1  | 1  | 0  |                              |
| <b>189 217 223 261</b>                              | B4ala   | 2  | ND | 1  | 1  | 1  | 0  |                              |
| <b>189 217 247 261</b>                              | B4alala | 1  | ND | 1  | 1  | 1  | ND | Seq. 103                     |
| <b>189 217 261 324</b>                              | B4a2a   | 3  | ND | ND | ND | ND | ND |                              |
| <b>Indonesia – Toraja, Sulawesi (n=64)</b>          |         |    |    |    |    |    |    |                              |
| <b>189 217 261</b>                                  | B4ala   | 3  | ND | 1  | 1  | 1  | 0  | Seq. 82                      |
| <b>189 217 261 311</b>                              | B4ala   | 1  | ND | 1  | 1  | 1  | 0  |                              |
| <b>189 217 247 261</b>                              | B4alala | 5  | ND | ND | ND | ND | ND | Seq. 98                      |
| <b>Indonesia – Ujung Padang, Sulawesi (n=46)</b>    |         |    |    |    |    |    |    |                              |
| <b>189 217 261</b>                                  | B4ala   | 3  | ND | 1  | 1  | 1  | 0  |                              |
| <b>189 217 223 261 335</b>                          | B4ala   | 1  | ND | 1  | 1  | 1  | 0  |                              |
| <b>189 217 261</b>                                  | B4alal  | 1  | ND | 1  | 1  | 1  | 1  | Seq. 87                      |
| <b>189 217 247 261</b>                              | B4alala | 3  | ND | ND | ND | ND | ND | Seq. 100                     |
| <b>Indonesia – Sumba</b>                            |         |    |    |    |    |    |    |                              |
| <b>188 189 217 223 261 355</b>                      | 1       | 1  | 1  | 1  | 1  | 1  | 0  | Seq. 73                      |
| <b>Indonesia – West Papua (n=178)</b>               |         |    |    |    |    |    |    |                              |
| <b>189 217 261</b>                                  | B4alal  | 1  | ND | 1  | 1  | 1  | 1  |                              |
| <b>189 217 247 261</b>                              | B4alala | 2  | ND | 1  | 1  | 1  | ND |                              |
| <b>189 217 247 255 261</b>                          | B4alala | 1  | ND | 1  | 1  | 1  | ND | Seq. 108                     |
| <b>Papua New Guinea – Madang (n=163)</b>            |         |    |    |    |    |    |    |                              |
| <b>189 217 261</b>                                  | B4alal  | 9  | ND | 1  | 1  | 1  | 1  |                              |
| <b>086 189 217 261</b>                              | B4alal  | 2  | ND | 1  | 1  | 1  | 1  |                              |
| <b>189 217 247 261</b>                              | B4alala | 23 | ND | 1  | 1  | 1  | ND | Seq. 109, 111, 112, 114, 120 |
| <b>189 217 247 260 261</b>                          | B4alala | 1  | ND | 1  | 1  | 1  | ND |                              |
| <b>189 217 247 261 293C</b>                         | B4alala | 1  | ND | 1  | 1  | 1  | ND |                              |
| <b>124 189 217 247 261 293C</b>                     | B4alala | 2  | ND | 1  | 1  | 1  | ND |                              |
| <b>189 217 247</b>                                  | B4alala | 1  | ND | 1  | 1  | 1  | ND |                              |
| <b>189 217 247 260 261</b>                          | B4alala | 1  | ND | 1  | 1  | 1  | ND |                              |
| <b>189 217 261</b>                                  | B4a*    | 1  | 0  | 0  | 0  | 0  | ND |                              |
| <b>Papua New Guinea – Southern Highlands (n=17)</b> |         |    |    |    |    |    |    |                              |
| <b>189 217 247 249 261</b>                          | B4alala | 1  | ND | 1  | 1  | 1  | ND | Seq. 126                     |

|                                                   |         |    |    |    |    |    |    |                                             |
|---------------------------------------------------|---------|----|----|----|----|----|----|---------------------------------------------|
| <b>126 189 217 247 261</b>                        | B4alala | 1  | ND | 1  | 1  | 1  | ND | Seq. 125                                    |
| <b>189 217 247 261 311</b>                        | B4alala | 1  | ND | 1  | 1  | 1  | ND | Seq. 127                                    |
| <b>Papua New Guinea – Port Moresby (n= 114)</b>   |         |    |    |    |    |    |    |                                             |
| <b>189 217 261</b>                                | B4alal  | 1  | ND | 1  | 1  | 1  | 1  |                                             |
| <b>189 217 260 261</b>                            | B4alal  | 1  | ND | 1  | 1  | 1  | 1  |                                             |
| <b>189 217 261 274</b>                            | B4alal  | 2  | ND | 1  | 1  | 1  | 1  |                                             |
| <b>189 217 247 261</b>                            | B4alal  | 11 | ND | 1  | 1  | 1  | 1  |                                             |
| <b>166C 189 247 261</b>                           | B4alala | 1  | ND | ND | ND | ND | ND |                                             |
| <b>189 217 247 261 289</b>                        | B4alala | 1  | ND | ND | ND | ND | ND |                                             |
| <b>Bismarck Archipelago – Kavieng (n=83)</b>      |         |    |    |    |    |    |    |                                             |
| <b>189 217 261 311</b>                            | B4alal  | 1  | ND | 1  | 1  | 1  | 1  |                                             |
| <b>051 189 214 217 261</b>                        | B4alal  | 1  | ND | 1  | 1  | 1  | 1  |                                             |
| <b>189 217 247 261</b>                            | B4alala | 21 | ND | 1  | 1  | 1  | ND | Seq. 133, 142, 143, 144, 145, 146, 147, 149 |
| <b>148 189 217 261</b>                            | B4alala | 1  | ND | 1  | 1  | 1  | ND | Seq. 132                                    |
| <b>189 217 247 261 311</b>                        | B4alala | 10 | ND | 1  | 1  | 1  | ND | Seq. 128, 130, 131                          |
| <b>066 189 247 261 311</b>                        | B4alala | 1  | ND | 1  | 1  | 1  | ND |                                             |
| <b>093 189 217 247 261 311</b>                    | B4alala | 3  | ND | 1  | 1  | 1  | ND |                                             |
| <b>189 217 247 311</b>                            | B4alala | 1  | ND | 1  | 1  | 1  | ND |                                             |
| <b>189 217 247 261 311 319</b>                    | B4alala | 1  | ND | 1  | 1  | 1  | ND | Seq. 129                                    |
| <b>093 189 217 247 261</b>                        | B4alala | 2  | ND | 1  | 1  | 1  | ND | Seq. 107                                    |
| <b>157 189 217 247 261</b>                        | B4alala | 1  | ND | 1  | 1  | 1  | ND |                                             |
| <b>188 189 217 247 261</b>                        | B4alala | 2  | ND | 1  | 1  | 1  | ND |                                             |
| <b>189 217 223 247 261</b>                        | B4alala | 2  | ND | 1  | 1  | 1  | ND |                                             |
| <b>189 217 233 247 261</b>                        | B4alala | 2  | ND | 1  | 1  | 1  | ND | Seq. 148                                    |
| <b>189 217 247 261 292</b>                        | B4alala | 1  | ND | 1  | 1  | 1  | ND |                                             |
| <b>189 217 247 261 302</b>                        | B4alala | 1  | ND | 1  | 1  | 1  | ND |                                             |
| <b>189 217 247 261 362</b>                        | B4alala | 2  | ND | 1  | 1  | 1  | ND | Seq. 105                                    |
| <b>189 217 247 362</b>                            | B4alala | 1  | ND | 1  | 1  | 1  | ND |                                             |
| <b>189 217 247 390</b>                            | B4alala | 1  | ND | 1  | 1  | 1  | ND |                                             |
| <b>Bismarck Archipelago – Lihir Island (n=94)</b> |         |    |    |    |    |    |    |                                             |
| <b>189 217 261</b>                                | B4alal  | 10 | ND | 1  | 1  | 1  | 1  | Seq. 93                                     |
| <b>084 189 217 261</b>                            | B4alal  | 1  | ND | 1  | 1  | 1  | 1  |                                             |
| <b>189 217 222 261</b>                            | B4alal  | 24 | ND | 1  | 1  | 1  | 1  |                                             |
| <b>084 189 217 222 261</b>                        | B4alal  | 5  | ND | 1  | 1  | 1  | 1  | Seq. 92                                     |
| <b>189 217 222 261 302</b>                        | B4alal  | 2  | ND | 1  | 1  | 1  | 1  |                                             |
| <b>129 189 217 261</b>                            | B4alal  | 1  | ND | 1  | 1  | 1  | 1  | Seq. 94                                     |
| <b>189 217 247 261 292</b>                        | B4alala | 3  | ND | 1  | 1  | 1  | ND | Seq. 134, 135                               |
| <b>189 217 247 261 302</b>                        | B4alala | 1  | ND | 1  | 1  | 1  | ND | Seq. 136                                    |
| <b>189 217 239 247 261 274</b>                    | B4alala | 3  | ND | 1  | 1  | 1  | ND | Seq. 124                                    |
| <b>Solomon Islands (n=21)</b>                     |         |    |    |    |    |    |    |                                             |
| <b>189 217 247 261</b>                            | B4alala | 4  | ND | 1  | 1  | 1  | ND |                                             |
| <b>189 217 247 261 311</b>                        | B4alala | 3  | ND | 1  | 1  | 1  | ND |                                             |
| <b>Vanuatu – Banks and Torres (n=76)</b>          |         |    |    |    |    |    |    |                                             |
| <b>189 217 247 261</b>                            | B4alala | 7  | ND | 1  | 1  | 1  | ND | Seq. 116, 117, 118, 119, 137, 153           |
| <b>189 217 219T 247 261</b>                       | B4alala | 2  | ND | 1  | 1  | 1  | ND | Seq. 139                                    |

|                                   |         |    |    |    |    |    |    |                   |
|-----------------------------------|---------|----|----|----|----|----|----|-------------------|
| <b>189 194C 217 219T 247 261</b>  | B4alala | 1  | ND | 1  | 1  | 1  | ND |                   |
| <b>189 217 219T 247 261 345</b>   | B4alala | 1  | ND | 1  | 1  | 1  | ND |                   |
| <b>Vanuatu – Port Olry (n=43)</b> |         |    |    |    |    |    |    |                   |
| <b>189 217 247 261</b>            | B4alala | 18 | ND | ND | ND | ND | ND | Seq.122, 138, 154 |
| <b>189 194C 217 247 261</b>       | B4alala | 2  | ND | ND | ND | ND | ND |                   |
| <b>189 217 242 247 294</b>        | B4alala | 1  | ND | ND | ND | ND | ND |                   |
| <b>189 217 247 261 362</b>        | B4alala | 1  | ND | ND | ND | ND | ND |                   |
| <b>189 217 247 294</b>            | B4alala | 1  | ND | ND | ND | ND | ND |                   |
| <b>Cook Islands (n=19)</b>        |         |    |    |    |    |    |    |                   |
| <b>189 217 247 261</b>            | B4alala | 15 | ND | ND | ND | ND | ND |                   |
| <b>189 217 247 261 294</b>        | B4alala | 1  | ND | ND | ND | ND | ND |                   |
| <b>126 189 217 247 261</b>        | B4alala | 1  | ND | ND | ND | ND | ND |                   |
| <b>126 189 217 261</b>            | B4alala | 2  | ND | ND | ND | ND | ND | Reversion 16247?  |
| <b>Vietnam (n=397)</b>            |         |    |    |    |    |    |    |                   |
| <b>189 217 261</b>                | B4a1*   | 2  | 1  | 0  | 0  | 0  | ND |                   |
| <b>140 189 217 261</b>            | B4a1*   | 1  | 1  | 0  | 0  | 0  | ND |                   |
| <b>189 217 219 261 286 355</b>    | B4a*    | 1  | 0  | 0  | 0  | 0  | ND |                   |
| <b>189 217 219 261 286</b>        | B4a*    | 1  | 0  | 0  | 0  | 0  | ND |                   |
| <b>129 189 217 261 311</b>        | B4a*    | 2  | 0  | 0  | 0  | 0  | ND |                   |
| <b>189 217 261 294</b>            | B4a*    | 1  | 0  | 0  | 0  | 0  | ND |                   |
| <b>Thailand (n=132)</b>           |         |    |    |    |    |    |    |                   |
| <b>093 188 189 214 217 261</b>    | B4a*    | 1  | 0  | 0  | 0  | 0  | ND |                   |
| <b>Taipei Laboratory</b>          |         |    |    |    |    |    |    |                   |
| <b>China – Fujian (n=149)</b>     |         |    |    |    |    |    |    |                   |
| <b>189 217 261</b>                | B4a*    | 1  | 0  | 0  | ND | ND | ND |                   |
| <b>129 189 261</b>                | B4h     | 1  | 0  | 0  | 0  | 0  | 0  | Seq. 32           |
| <b>189 217 261 299</b>            | B4a*    | 1  | 0  | 0  | ND | ND | ND |                   |
| <b>93 189 217 261</b>             | B4a*    | 1  | 0  | 0  | ND | ND | ND |                   |
| <b>189 217 261</b>                | B4a1*   | 1  | 1  | 0  | 0  | 0  | 0  | Seq. 52           |
| <b>154 189 217 240 261</b>        | B4a1*   | 1  | 1  | ND | ND | ND | 0  |                   |
| <b>93 189 217 261 311</b>         | B4a1*   | 1  | 1  | 0  | ND | ND | ND |                   |
| <b>Taiwan – Ami (n=98)</b>        |         |    |    |    |    |    |    |                   |
| <b>189 217 261</b>                | B4ala   | 18 | 1  | 1  | ND | ND | 0  | Seq. 65, 69       |
| <b>189 217 261 274</b>            | B4ala   | 6  | 1  | 1  | ND | ND | 0  | Seq. 66           |
| <b>189 217 261 311</b>            | B4ala   | 8  | 1  | 1  | ND | ND | 0  |                   |
| <b>93 189 217 223 261</b>         | B4ala   | 1  | 1  | 1  | 1  | 1  | 0  | Seq. 71           |
| <b>94 189 217 261</b>             | B4ala   | 10 | 1  | 1  | 1  | 1  | 0  | Seq. 61           |
| <b>94 189 217 261 326C</b>        | B4ala   | 1  | 1  | 1  | ND | ND | 0  |                   |
| <b>Taiwan – Atayal (n=108)</b>    |         |    |    |    |    |    |    |                   |
| <b>77 189 217 261</b>             | B4ala   | 3  | 1  | 1  | ND | ND | 0  |                   |
| <b>129 189 217 261</b>            | B4ala   | 1  | 1  | 1  | 1  | 1  | 0  | Seq. 63           |
| <b>154 189 217 261 324</b>        | B4a2a   | 1  | 0  | ND | ND | ND | 0  |                   |
| <b>Taiwan – Hakka (n=74)</b>      |         |    |    |    |    |    |    |                   |
| <b>189 217 240 261</b>            | B4a*    | 1  | 0  | 0  | ND | ND | ND |                   |
| <b>189 217 261 299</b>            | B4a*    | 1  | 0  | 0  | ND | ND | ND |                   |
| <b>189 213 217 261 295 299</b>    | B4a*    | 1  | 0  | 0  | ND | ND | ND |                   |
| <b>189 217 261 304</b>            | B4a*    | 1  | 0  | 0  | ND | ND | ND |                   |
| <b>217 261 299</b>                | B4a*    | 1  | 0  | 0  | ND | ND | ND |                   |
| <b>93 189 217 261</b>             | B4a*    | 2  | 0  | 0  | ND | ND | ND |                   |
| <b>189 217 261 324</b>            | B4a2a   | 1  | 0  | 0  | ND | ND | ND |                   |

|                                    |       |    |    |    |    |    |    |         |
|------------------------------------|-------|----|----|----|----|----|----|---------|
| <b>Taiwan – Minnan (n=173)</b>     |       |    |    |    |    |    |    |         |
| 189 217 261 324                    | B4a2a | 1  | 0  | 0  | ND | ND | ND |         |
| 189 217 234 261                    | B4a*  | 2  | 0  | 0  | ND | ND | ND |         |
| 129 189 217 261                    | B4a*  | 1  | 0  | 0  | ND | ND | ND |         |
| 129 189 217 261 356                | B4a*  | 1  | 0  | 0  | ND | ND | ND |         |
| 189 213 217 235 242 261<br>292 301 | B4a*  | 1  | 0  | 0  | ND | ND | ND |         |
| 189 217 261                        | B4a*  | 2  | 0  | 0  | ND | ND | ND |         |
| 51 129 189 217 261 354             | B4a*  | 1  | 0  | 0  | ND | ND | ND |         |
| <b>Taiwan – Paiwan (n=55)</b>      |       |    |    |    |    |    |    |         |
| 189 217 261 272 324                | B4a2a | 9  | 0  | 0  | 0  | 0  | 0  | Seq. 39 |
| <b>Taiwan – Pazeh (n=65)</b>       |       |    |    |    |    |    |    |         |
| 189 217 221 240 261                | B4a1* | 2  | 1  | 0  | ND | ND | 0  |         |
| 154 189 217 261 324                | B4a2a | 1  | 0  | 0  | ND | ND | ND |         |
| 129 189 217 261 309                | B4a*  | 1  | 0  | 0  | ND | ND | ND |         |
| 136 182 183 189 217                | B4a*  | 1  | 0  | 0  | ND | ND | ND |         |
| <b>Taiwan – Puyuma (n=52)</b>      |       |    |    |    |    |    |    |         |
| 189 217 261 272 324                | B4a2a | 2  | ND | 0  | ND | ND | ND |         |
| <b>Taiwan - Rukai (n=51)</b>       |       |    |    |    |    |    |    |         |
| 189 217 261                        | B4a1a | 1  | 1  | 1  | ND | ND | 0  |         |
| 189 217 261 274                    | B4a1a | 2  | 1  | 1  | ND | ND | 0  |         |
| 189 217 261 272 324                | B4a2a | 5  | ND | 0  | ND | ND | ND |         |
| <b>Taiwan – Saisiat (n=64)</b>     |       |    |    |    |    |    |    |         |
| 154 189 217 261                    | B4a2a | 1  | 0  | 0  | ND | ND | ND |         |
| 154 189 217 261 324                | B4a2a | 1  | 0  | 0  | ND | ND | 0  | Seq. 40 |
| <b>Taiwan – Siraya (n=364)</b>     |       |    |    |    |    |    |    |         |
| 129 189 217 261                    | B4a*  | 3  | 0  | ND | ND | ND | ND |         |
| 129 189 217 261 287                | B4a*  | 1  | 0  | ND | ND | ND | ND | Seq. 31 |
| 129 189 217 261 356                | B4a*  | 1  | 0  | ND | ND | ND | ND |         |
| 189 217 261                        | B4a1a | 1  | 1  | 1  | ND | ND | 0  |         |
| 189 217 261 311                    | B4a1a | 1  | 1  | 1  | ND | ND | 0  |         |
| 129 189 217 261                    | B4a1a | 1  | 1  | 1  | ND | ND | 0  |         |
| 129 189 217 261 311 325            | B4a1a | 1  | 1  | ND | ND | ND | 0  |         |
| 168 189 217 261 311                | B4a1a | 1  | 1  | 1  | ND | ND | 0  |         |
| 189 217 223 261                    | B4a1a | 3  | 1  | 1  | ND | ND | 0  | Seq. 70 |
| 189 217 261 274                    | B4a1a | 2  | 1  | 1  | ND | ND | 0  |         |
| 93 189 217 261 362                 | B4a1a | 1  | 1  | ND | ND | ND | 0  |         |
| 189 217 261 324                    | B4a2a | 12 | 0  | ND | ND | ND | ND |         |
| 129 189 217 261 324                | B4a2a | 6  | 0  | ND | ND | ND | ND |         |
| 189 217 261 272 324                | B4a2a | 1  | 0  | ND | ND | ND | ND |         |
| <b>Taiwan – Toroko (n=53)</b>      |       |    |    |    |    |    |    |         |
| 154 189 217 261 324                | B4a2a | 5  | 0  | ND | ND | ND | ND |         |
| <b>Taiwan – Tsou (n=60)</b>        |       |    |    |    |    |    |    |         |
| 189 217 261                        | B4a1a | 6  | 1  | 1  | ND | ND | 0  | Seq. 64 |
| <b>Taiwan – XinMen (n=38)</b>      |       |    |    |    |    |    |    |         |
| 189 217 261                        | B4a1* | 6  | 0  | 0  | ND | ND | ND |         |
| <b>Taiwan – Yami (n=79)</b>        |       |    |    |    |    |    |    |         |
| 189 217 261 360A                   | B4a1a | 9  | 1  | 1  | 1  | 1  | 0  | Seq. 62 |
| 189 217 261 324                    | B4a2a | 1  | 0  | 0  | ND | ND | ND |         |
| 129 189 217 261 324                | B4a2a | 12 | 0  | 0  | ND | ND | 0  | Seq. 38 |
| <b>Indonesia – Java (n=228)</b>    |       |    |    |    |    |    |    |         |
| 189 217 261                        | B4a1* | 1  | 1  | 0  | ND | ND | ND | Seq. 83 |
| 93 189 217 261                     | B4a1* | 3  | 1  | 0  | ND | ND | 0  |         |
| 189 217 261                        | B4a1a | 3  | 1  | 1  | ND | ND | 0  |         |

|                                            |       |   |   |   |    |    |   |         |
|--------------------------------------------|-------|---|---|---|----|----|---|---------|
| <b>129 189 217 261</b>                     | B4a1a | 1 | 1 | 1 | ND | ND | 0 |         |
| <b>189 217 223 261</b>                     | B4a1a | 1 | 1 | 1 | ND | ND | 0 |         |
| <b>Indonesia (unspecified)<br/>(n=32)</b>  |       |   |   |   |    |    |   |         |
| <b>189 217 261</b>                         | B4a1a | 1 | 1 | 1 | ND | ND | 0 |         |
| <b>189 217 261 362</b>                     | B4a1a | 1 | 1 | 1 | ND | ND | 0 |         |
| <b>Indonesia – Kalimantan<br/>(n=42)</b>   |       |   |   |   |    |    |   |         |
| <b>189 217 261</b>                         | B4a1a | 2 | 1 | 1 | ND | ND | 0 |         |
| <b>Indonesia – Sumatra (n=29)</b>          |       |   |   |   |    |    |   |         |
| <b>189 217 261</b>                         | B4a1a | 2 | 1 | 1 | ND | ND | 0 |         |
| <b>Indonesia – Sulawesi<br/>(n=31)</b>     |       |   |   |   |    |    |   |         |
| <b>168 189 217 261 311</b>                 | B4a1* | 1 | 1 | 0 | ND | ND | 0 |         |
| <b>189 217 261</b>                         | B4a1a | 1 | 1 | 1 | ND | ND | 0 |         |
| <b>Indonesia – Nusa Tenggara<br/>(n=2)</b> |       |   |   |   |    |    |   |         |
| <b>93 217 261</b>                          | B4a1a | 1 | 1 | 1 | ND | ND | 0 |         |
| <b>Indonesia – Timor (n=33)</b>            |       |   |   |   |    |    |   |         |
| <b>189 217 261</b>                         | B4a1a | 1 | 1 | 1 | ND | ND | 0 |         |
| <b>Thailand (n=78)</b>                     |       |   |   |   |    |    |   |         |
| <b>189 213 217 261 292</b>                 | B4a*  | 1 | 0 | 0 | 0  | 0  | 0 |         |
| <b>93 188 189 214 217 261</b>              | B4a1* | 1 | 1 | 0 | 0  | 0  | 0 | Seq. 48 |
| <b>Vietnam – Hanoi (n=58)</b>              |       |   |   |   |    |    |   |         |
| <b>189 217 219 261 286</b>                 | B4a*  | 1 | 0 | 0 | ND | ND | 0 |         |
| <b>189 217 261 274 348</b>                 | B4a1* | 1 | 1 | 0 | ND | ND | 0 |         |
| <b>048 189 217 261</b>                     | B4a1* | 1 | 1 | 0 | 0  | 0  | 0 | Seq. 41 |
| <b>189 217 261</b>                         | B4a1* | 1 | 1 | 0 | 0  | 0  | 0 | Seq. 42 |

Typing is scored as “0” meaning that the position carries the same nucleotide as the reference sequence, “1” meaning that the nucleotide at that position differs from the reference sequence and “ND” meaning the sample was not tested at that position. HVS-I sequence types are indicated as variant positions from the reference sequence, less 16,000, with transversions indicated by a suffix. Numbers of complete sequences in the last column refer to the numbering in Table S1 and Figure S1.

**Table S3. Age Estimates with Associated 95% Confidence Limits of B4a1a in ISEA and Taiwan, using ML (Maximum Likelihood) with the Complete Genome Clock, and  $\rho$  with Three Different Molecular Clocks, Two of Them with Independent Sources of Variation (Control-Region and Synonymous Clocks)**

|                                                 | <b>Overall (ML1<sup>1</sup>)</b> | <b>Taiwan (ML2<sup>1</sup>)</b> | <b>ISEA (ML3<sup>1</sup>)</b> |
|-------------------------------------------------|----------------------------------|---------------------------------|-------------------------------|
| <b>Maximum likelihood</b>                       | 8450 (6700; 10,250)              | 8250 (5100;11,450)              | 8250 (6000; 10,550)           |
| <b>Complete genome clock, <math>\rho</math></b> | 9700 (5000;14,500)               | 7900 (5500;10,350)              | 8000 (5600;10,400)            |
| <b>Control region, <math>\rho</math></b>        | 10,700 (4850; 16,550)            | 9750 (1150; 18,350)             | 10,850 (4000 ; 17,700)        |
| <b>Synonymous, <math>\rho</math></b>            | 12,750 (1000; 24,500)            | 10,400 (6800;13,950)            | 10,750 (7300;14,200)          |

<sup>1</sup>ML1, ML2 and ML3 refer to the independent ML (maximum likelihood) analyses described above. Analyses exclude the Pacific data, since the high frequency of B4a1a1a (due to founder effects) would bias the results.

**Table S4. HVS-I Variation of B4a1a in Taiwan and ISEA using  $\rho$ , Haplotype Diversity and  $\pi$**

| <b>Region</b>                  | <b><i>n</i></b> | <b>Age estimate (years) and 95% CI<sup>1</sup></b> | <b>Haplotype diversity</b> | <b><math>\pi</math></b> |
|--------------------------------|-----------------|----------------------------------------------------|----------------------------|-------------------------|
| <b>Taiwan<sup>2</sup></b>      | 82              | 9750 (1150; 18,350)                                | 0.732                      | 1.055                   |
| <b>Philippines</b>             | 73              | 9150 (2250; 16,100)                                | 0.606                      | 1.007                   |
| <b>Indonesia/East Malaysia</b> | 110             | 11,800 (2800; 20,850)                              | 0.745                      | 1.270                   |
| <b>ISEA<sup>3</sup></b>        | 183             | 10,850 (4000; 17,700)                              | 0.709                      | 1.213                   |
| <b>Overall</b>                 | 275             | 10,700 (4850; 16,550)                              |                            |                         |

<sup>1</sup>Confidence intervals

<sup>2</sup>Excluding the Yami, due to their probable recent ancestry in the Philippines

<sup>3</sup>ISEA (Island Southeast Asia) includes Indonesia/East Malaysia and the Philippines.

**Table S5. Pooled Founder Ages, with Associated 95% Confidence Intervals, using the *f<sub>I</sub>* Criterion, from Taiwan into ISEA and Vice Versa, using  $\rho$  and a Control-Region Clock (HVS-I), a Synonymous Mutation Clock (SYN) and a Time-Dependent Complete Genome Clock (CS)**

|              | <b>Taiwan to ISEA</b> | <b>ISEA to Taiwan</b> |
|--------------|-----------------------|-----------------------|
| <b>HVS-I</b> | 8170 (2750; 13,600)   | 5700 (0; 11,600)      |
| <b>SYN</b>   | 9750 (2450; 17,100)   | 8650 (2700; 14,650)   |
| <b>CS</b>    | 7150 (3700; 10,650)   | 6300 (3450; 9150)     |

**Table S6. Age Estimates and Diversity Measures of Paragroup B4a1a1\* (*i.e.*, the Clade B4a1a1 but Excluding the Polynesian Motif-Derived Subclade, B4a1a1a) in the Pacific, using the Control-Region Variation between Positions 16051 and 16400**

| Region                                 | <i>n</i> | Age estimate (years) | 95% CI <sup>1</sup> (years) | Haplotype diversity | $\pi$ |
|----------------------------------------|----------|----------------------|-----------------------------|---------------------|-------|
| North coast of New Guinea <sup>2</sup> | 24       | 2800                 | (0; 6600)                   | 0.292               | 0.331 |
| Bismarck Archipelago                   | 79       | 12,250               | (0; 25,650)                 | 0.732               | 1.104 |
| Bougainville                           | 15       | 6650                 | (500, 12,800)               | 0.604               | 0.781 |
| Solomon Islands                        | 33       | 9600                 | (0; 20,200)                 | 0.714               | 0.981 |
| Polynesia                              | 15       | 4400                 | (0; 11,350)                 | 0.420               | 0.200 |
| Overall                                | 166      | 8800                 | (1900; 15,700)              |                     |       |

<sup>1</sup>Confidence interval

<sup>2</sup>Pooled data from Madang, Sepik Province and Karkar Island

**Table S7. Age Estimates (using  $\rho$  and the HVS-I Molecular Clock) and Diversity Measures of B4a1a1a in Indonesia and the Pacific, using the Control-Region Variation between Positions 16051 and 16400**

| Region                                 | <i>n</i> | Age estimate using $\rho$ (years) and 95% CI <sup>1</sup> | Haplotype diversity | $\pi$ |
|----------------------------------------|----------|-----------------------------------------------------------|---------------------|-------|
| Indonesia                              | 34       | 3450 (250; 6600)                                          | 0.360               | 0.405 |
| North coast of New Guinea <sup>2</sup> | 62       | 5400 (1600; 9200)                                         | 0.393               | 0.624 |
| Bismarck Archipelago                   | 290      | 12,000 (5350; 18,650)                                     | 0.781               | 1.349 |
| Bougainville                           | 89       | 9500 (2550; 16,400)                                       | 0.700               | 1.082 |
| Solomon Islands                        | 130      | 5150 (0; 10,500)                                          | 0.494               | 0.566 |
| South coast of New Guinea              | 16       | 6650 (500; 12,800)                                        | 0.578               | 0.781 |
| Vanuatu                                | 37       | 4950 (350; 9550)                                          | 0.260               | 0.571 |
| Polynesia                              | 114      | 4350 (2050; 6650)                                         | 0.411               | 0.516 |
| Madagascar                             | 35       | 1900 (0; 4200)                                            | 0.160               | 0.225 |
| Overall Near Oceania <sup>3</sup>      | 587      | 9150 (4750; 13,550)                                       |                     |       |
| Overall                                | 807      | 7700 (4300; 11,100)                                       |                     |       |

<sup>1</sup>Confidence interval

<sup>2</sup>Pooled data from Madang, Sepik Province and Karkar Island

<sup>3</sup>Pooled data of North Coast of New Guinea, Bismarck Archipelago, Bougainville, Solomon Islands and South Coast of New Guinea

**Table S8. Pooled Founder Age of B4a1a1a (the Polynesian Motif-Derived Clade) Founders into Remote Oceania, Calculated Separately for Vanuatu, Western Polynesia (Tonga and Samoa), Eastern Polynesia (the Cook Islands and French Polynesia), and the Overall Dataset, using Three Molecular Clocks and  $\rho$  as the Estimator**

| Molecular Clock           | Region            | <i>n</i> | Point estimate (years) and 95% CI <sup>1</sup> |
|---------------------------|-------------------|----------|------------------------------------------------|
| <b>Control region</b>     | Vanuatu           | 35       | 3600 (0; 7750)                                 |
|                           | Western Polynesia | 73       | 2950 (1000; 4900)                              |
|                           | Eastern Polynesia | 41       | 2450 (200; 4700)                               |
|                           | Pooled data       | 149      | 3350 (1650; 5050)                              |
| <b>Complete sequences</b> | Vanuatu           | 12       | 3450 (1150; 5800)                              |
| <b>Synonymous</b>         | Vanuatu           | 12       | 3250 (0; 6700)                                 |

<sup>1</sup>Confidence interval

**Table S9. mtDNA Lineages Found in Three or More Regions of the Voyaging Corridor**

| Haplogroup  | HVS-I variants (less 16,000)         | Frequency of mtDNA motif (%) |                              |                           |                                            |                                |                                            |                           |                                 |
|-------------|--------------------------------------|------------------------------|------------------------------|---------------------------|--------------------------------------------|--------------------------------|--------------------------------------------|---------------------------|---------------------------------|
|             |                                      | Taiwan ( <i>n</i> =977)      | Philippines ( <i>n</i> =556) | Wallacea ( <i>n</i> =925) | North coast of New Guinea ( <i>n</i> =403) | Bismarck Sea ( <i>n</i> =1260) | South coast of New Guinea ( <i>n</i> =177) | Solomons ( <i>n</i> =259) | Remote Oceania ( <i>n</i> =278) |
| <b>B5b</b>  | 111 140 189 234 243 399              | 0.00                         | 1.44                         | 0.00                      | 0.25                                       | 0.00                           | 0.56                                       | 0.00                      | 0.72                            |
| <b>E1b</b>  | 223 261 362 390                      | 0.00                         | 1.26                         | 3.13                      | 0.50                                       | 5.56                           | 2.82                                       | 0.00                      | 0.36                            |
| <b>M7b1</b> | 126 129 192 223 297                  | 0.61                         | 0.90                         | 0.22                      | 0.99                                       | 0.08                           | 0.00                                       | 0.00                      | 0.00                            |
| <b>M28</b>  | 86 129 148 223 362 (468)             | 0.00                         | 0.00                         | 0.00                      | 0.50                                       | 17.86                          | 0.00                                       | 1.16                      | 3.96                            |
| <b>P1</b>   | 176 266 357                          | 0.00                         | 0.00                         | 0.43                      | 1.99                                       | 3.02                           | 5.08                                       | 0.00                      | 1.80                            |
| <b>P1</b>   | 176 266 270 357                      | 0.00                         | 0.00                         | 0.43                      | 0.99                                       | 0.87                           | 4.52                                       | 0.00                      | 3.96                            |
| <b>P1</b>   | 176 357                              | 0.00                         | 0.00                         | 0.65                      | 0.50                                       | 0.08                           | 6.78                                       | 0.00                      | 3.60                            |
| <b>P1</b>   | 176 209 266 357                      | 0.00                         | 0.00                         | 0.00                      | 0.25                                       | 1.03                           | 0.00                                       | 0.00                      | 0.36                            |
| <b>Q1</b>   | 129 144 148 223 241 265C 311 343     | 0.00                         | 0.00                         | 1.41                      | 17.12                                      | 0.87                           | 12.99                                      | 0.77                      | 0.00                            |
| <b>Q1</b>   | 129 144 148 222 241 265C 311 343     | 0.00                         | 0.00                         | 0.76                      | 7.20                                       | 0.24                           | 3.39                                       | 0.00                      | 9.35                            |
| <b>Q1</b>   | 129 144 148 241 265C 311 343         | 0.00                         | 0.00                         | 1.84                      | 6.45                                       | 6.03                           | 5.08                                       | 4.63                      | 5.76                            |
| <b>Q1</b>   | 129 144 148 172 223 241 265C 311 343 | 0.00                         | 0.00                         | 1.95                      | 0.25                                       | 0.40                           | 2.26                                       | 0.00                      | 0.00                            |
| <b>Q1</b>   | 129 144 148 223 241 261 265C 311 343 | 0.00                         | 0.00                         | 0.00                      | 2.98                                       | 0.24                           | 2.82                                       | 0.00                      | 0.00                            |
| <b>Q1</b>   | 129 144 148 223 241 264 265C 311 343 | 0.00                         | 0.00                         | 0.00                      | 0.50                                       | 4.30                           | 0.00                                       | 3.09                      | 0.00                            |
| <b>Q2</b>   | 66 129 223 241                       | 0.00                         | 0.00                         | 0.76                      | 0.50                                       | 7.70                           | 0.00                                       | 2.70                      | 0.36                            |



### Supplemental References

1. Kong, Q.-P., Yao, Y.-G., Sun, C., Bandelt, H.-J., Zhu, C.-L., Zhang, Y.-P. (2003) Phylogeny of East Asian mitochondrial DNA lineages inferred from complete sequences. *Am. J. Hum. Genet.* 73:671-676 (erratum 675:157)
2. Macaulay, V., Hill, C., Achilli, A., Rengo, C., Clarke, D., Meehan, W., Blackburn, J., Semino, O., Scozzari, R., Cruciani, F. et al. (2005) Single, rapid coastal settlement of Asia revealed by analysis of complete mitochondrial genomes. *Science* 308:1034-1036
3. Kong, Q.-P., Bandelt, H.-J., Sun, C., Yao, Y.-G., Salas, A., Achilli, A., Wang, C.-Y., Zhong, L., Zhu, C.-L., Wu, S.-F. et al. (2006) Updating the East Asian mtDNA phylogeny: a prerequisite for the identification of pathogenic mutations. *Human Mol. Genet.* 15:2076-2086
4. Tanaka, M., Cabrera, V.M., González, A.M., Larruga, J.M., Takeyasu, T., Fuku, N., Guo, L.-J., Hirose, R., Fujita, Y., Kurata, M. et al. (2004) Mitochondrial genome variation in Eastern Asia and the peopling of Japan. *Genome Res.* 14:1832-1850
5. Starikovskaya, Y.B., Sukernik, R.I., Derbeneva, O.A., Volodko, N.V., Torroni, A., Ruiz-Pesini, E., Brown, M.D., Lott, M.T., Hosseini, S.H., Huoponen, K. et al. (2005) Mitochondrial DNA diversity in indigenous populations of the southern extent of Siberia, and the origins of Native American haplogroups. *Am. J. Hum. Genet.* 69:67-89
6. Mishmar, D., Ruiz-Pesini, E., Golik, P., Macaulay, V., Clark, A.G., Hosseini, S., Brandon, M., Easley, K., Chen, E., Brown, M.D. et al. (2003) Natural selection shaped regional mtDNA variation in humans. *Proc. Natl Acad. Sci. USA* 100:171-176
7. Ingman, M., Kaessmann, H., Pääbo, S., Gyllensten, U. (2000) Mitochondrial genome variation and the origin of modern humans. *Nature* 408:708-713
8. Ingman, M., Gyllensten, U. (2003) Mitochondrial genome variation and evolutionary history of Australian and New Guinean aborigines. *Genome Res.* 13:1600-1606
9. Trejaut, J.A., Kivisild, T., Loo, J.H., Lee, C.L., He, C.L., Xi, J.R., Li, Z.Y., Lin, M. (2005) Traces of archaic mitochondrial lineages persist in Austronesian speaking Formosan populations. Unambiguous linkage between Aboriginal Taiwanese and Polynesians to the exclusion of Mainland Asians. *PLoS Biol.* 3:e247
10. Tabbada, K.A., Trejaut, J., Loo, J.H., Chen, Y.M., Lin, M., Mirazón-Lahr, M., Kivisild, T., De Ungria, M.C. (2010) Philippine mitochondrial DNA diversity: a populated viaduct between Taiwan and Indonesia? *Mol. Biol. Evol.* 27:21-31
11. Pierson, M.J., Martinez-Arias, R., Holland, B.R., Gemmell, N.J., Hurles, M.E., Penny, D. (2006) Deciphering past human population movements in Oceania: provably optimal trees of 127 mtDNA genomes. *Mol Biol. Evol.* 23:1966-1975
